# Supplementary material for: Detection and infectivity of SARS-CoV-2 in Korean municipal wastewater facilities and characterization of environmental factors influencing wastewater-bound SARS-CoV-2
Source: Royal Society of Chemistry journal article supplement (doi:10.1039/d4ew00334a), 2024-01-01
Supplement: d4ew00334a1.pdf [file d4ew00334a1.pdf]

## Supporting Information

Detection and infectivity of SARS-CoV-2 in Korean municipal wastewater facilities and characterization of environmental factors influencing wastewater-bound SARS-CoV-2

Jayun Kim<sup>ab</sup>, Yoon-ji Kim<sup>c</sup>, Sook-young Lee<sup>d</sup>, Jae-Ku Oem<sup>c</sup>, Subin Kim<sup>a</sup>, Keugtae Kim<sup>e</sup>,  
Woosik Jung<sup>a</sup>, Sungpyo Kim<sup>f</sup>, Dong-Hwan Jeong<sup>g\*</sup>, Minjoo Lee<sup>a</sup>, Soo-Hyung Lee<sup>g</sup>, Hyunook  
Kim<sup>h</sup>, and Joonhong Park<sup>a\*</sup>

<sup>a</sup>Department of Civil and Environmental Engineering, Yonsei University, Seoul, Republic of Korea

<sup>b</sup>Division of Environmental Health Sciences, The Ohio State University, OH, USA

<sup>c</sup>Laboratory of Veterinary Infectious Disease, College of Veterinary Medicine, Jeonbuk National University, Iksan, Republic of Korea

<sup>d</sup>Division of Life Sciences, Korea Polar Research Institute, Incheon, Republic of Korea

<sup>e</sup>Department of Biological and Environmental Science, Dongguk University, Goyang, Republic of Korea

<sup>f</sup>Department of Environmental Engineering, Korea University Sejong Campus, Sejong, Republic of Korea

<sup>g</sup>Water Supply and Sewerage Research Division, National Institute of Environmental Research, Incheon, Republic of Korea

<sup>h</sup>Department of Environmental Engineering, University of Seoul, Seoul, Republic of Korea

\*Corresponding authors: [dwcheong@korea.kr](mailto:dwcheong@korea.kr) (D.-H. Jeong) and [parkj@yonsei.ac.kr](mailto:parkj@yonsei.ac.kr) (J. Park)

**SI Table S1.**

Primers and probes for RT-qPCR PEDV quantification, cycling conditions, and equations for calculating the recovery rate.

| <b>Forward primer</b>                             | <b>Reverse primer</b>                             | <b>Probe</b>                                                    | <b>Cycling conditions</b>                                                                                                                      | <b>Recovery rate calculation</b>                                                                                                                                                                                                                 |
|---------------------------------------------------|---------------------------------------------------|-----------------------------------------------------------------|------------------------------------------------------------------------------------------------------------------------------------------------|--------------------------------------------------------------------------------------------------------------------------------------------------------------------------------------------------------------------------------------------------|
| 5'-CGC<br>AAA GAC<br>TGA ACC<br>CAC TAA<br>TTT-3' | 5'-TTG<br>CCT CTG<br>TTG TTA<br>CTT GGA<br>GAT-3' | 5'-HEX-<br>TGT TGC<br>CAT TGC<br>CAC GAC<br>TCC TGC-<br>BHQ2-3' | 50°C for 20 min,<br>95°C for 10 min, 5<br>cycles of 95°C for<br>10s and 60°C for<br>30s, and 40 cycles<br>of 95°C for 10s and<br>60°C for 30s. | Recovery rate =<br><br><i>Concentration of quantified<br/>PEDV in wastewater<br/>after sample processing<br/>(gene copies/L)</i><br><hr/> <i>Concentration of seeded<br/>PEDV in wastewater<br/>before sample processing<br/>(gene copies/L)</i> |

**SI Table S2.**

Information of SARS-CoV-2 RT-qPCR detection kits.

| Kit                                                  | Target gene     | Primers and probe (5'-3')                                                                                                            | Cycling conditions                                                                                                                  | Limit of detection                                              | Detection criteria for positive                                                      |
|------------------------------------------------------|-----------------|--------------------------------------------------------------------------------------------------------------------------------------|-------------------------------------------------------------------------------------------------------------------------------------|-----------------------------------------------------------------|--------------------------------------------------------------------------------------|
| PowerChek™ 2019-nCoV Real-time PCR                   |                 | RdRp Forward:<br>GTG ARA TGG<br>TCA TGT GTG<br>GCG G                                                                                 | 50 °C for 30 min, 95 °C for 10 min, and 40 cycles of 95 °C for 15 s and 60 °C for 1 min.                                            | 18 gene copies /reaction                                        | RdRp $C_t \leq 37$ , E gene $C_t \leq 37$ , and positive control $C_t \leq 28$       |
| careGENE™ N-CoV RT-PCR                               |                 | RdRp Reverse:<br>CAR ATG TTA<br>AAS ACA CTA<br>TTA GCA TA                                                                            | 25 °C for 2 min, 55 °C for 10 min, 94 °C for 3 min, and 45 cycles of 94 °C for 15 s and 60 °C for 30 s.                             | 50 gene copies /reaction                                        | RdRp, E gene, and positive control $C_t \leq 45$                                     |
| STANDAR D™ M nCoV Real-time Detection                | RdRp and E gene | RdRp Probe: FAM-<br>CAG GTG GAA<br>CCT CAT CAG<br>GAG ATG C-BHQ                                                                      | 50 °C for 15 min, 95 °C for 3 min, 5 cycles of 95 °C for 5 s and 60 °C for 40 s, and 40 cycles of 95 °C for 5 s and 60 °C for 40 s. | 5 gene copies /reaction                                         | RdRp $C_t \leq 36$ , E gene $C_t \leq 36$ , and positive control $C_t \leq 32$       |
| Real-Q 2019-nCoV Detection                           |                 | E gene Forward:<br>ACA GGT ACG<br>TTA ATA GTT<br>AAT AGC GT                                                                          | 50 °C for 30 min, 95 °C for 15 min and 40 cycles at 95 °C for 15 s, and 62 °C for 45 s                                              | 31.25 gene copies /reaction                                     | RdRp $C_t \leq 38$ , E gene $C_t \leq 38$ , and positive control $C_t \leq 28 \pm 5$ |
| SARS-CoV-2 Research Use Only qPCR Primer & Probe Kit | RdRp            | E gene Reverse:<br>ATA TTG CAG<br>CAG TAC GCA<br>CAC A<br>E gene Probe: FAM<br>(HEX)-ACA CTA<br>GCC ATC CTT<br>ACT GCG CTT<br>CG-BHQ | 45 °C for 20 min, 95 °C for 2 min and 45 cycles at 95 °C for 10 s, and 55 °C for 30 s                                               | 35 gene copies/reaction (Barra et al., 2020; Kaya et al., 2022) | $C_t \leq 35$ and positive control $C_t \leq 35$                                     |

**SI Table S3.**

Cycle threshold results of RT-qPCR for SARS-CoV-2 detection in cell lysates from wastewater (WW) for infectivity testing.

| Sample       |                      | Passage 1 |        | Passage 2 |        | Passage 3 |        | Detection |
|--------------|----------------------|-----------|--------|-----------|--------|-----------|--------|-----------|
|              |                      | RdRp      | E gene | RdRp      | E gene | RdRp      | E gene |           |
| Raw          | WW (Vero)            | > 40      | > 40   | > 40      | > 40   | > 40      | > 40   | Negative  |
| Frozen       | WW (Vero)            | > 40      | > 40   | > 40      | > 40   | > 40      | > 40   | Negative  |
| Concentrated | WW (Vero)            | > 40      | > 40   | > 40      | > 40   | > 40      | > 40   | Negative  |
| Raw          | WW (A549)            | > 40      | > 40   | > 40      | > 40   | > 40      | > 40   | Negative  |
| Frozen       | WW (A549)            | > 40      | > 40   | > 40      | > 40   | > 40      | > 40   | Negative  |
| Concentrated | WW (A549)            | > 40      | > 40   | > 40      | > 40   | > 40      | > 40   | Negative  |
| Negative     | control              | > 40      | > 40   | > 40      | > 40   | > 40      | > 40   | Negative  |
| Positive     | control <sup>1</sup> | 24.18     | 26.57  | 24.05     | 27.78  | 26.12     | 27.10  | Positive  |

<sup>1</sup>Positive material corresponding to 100 gene copies/reaction was used for RT-qPCR.

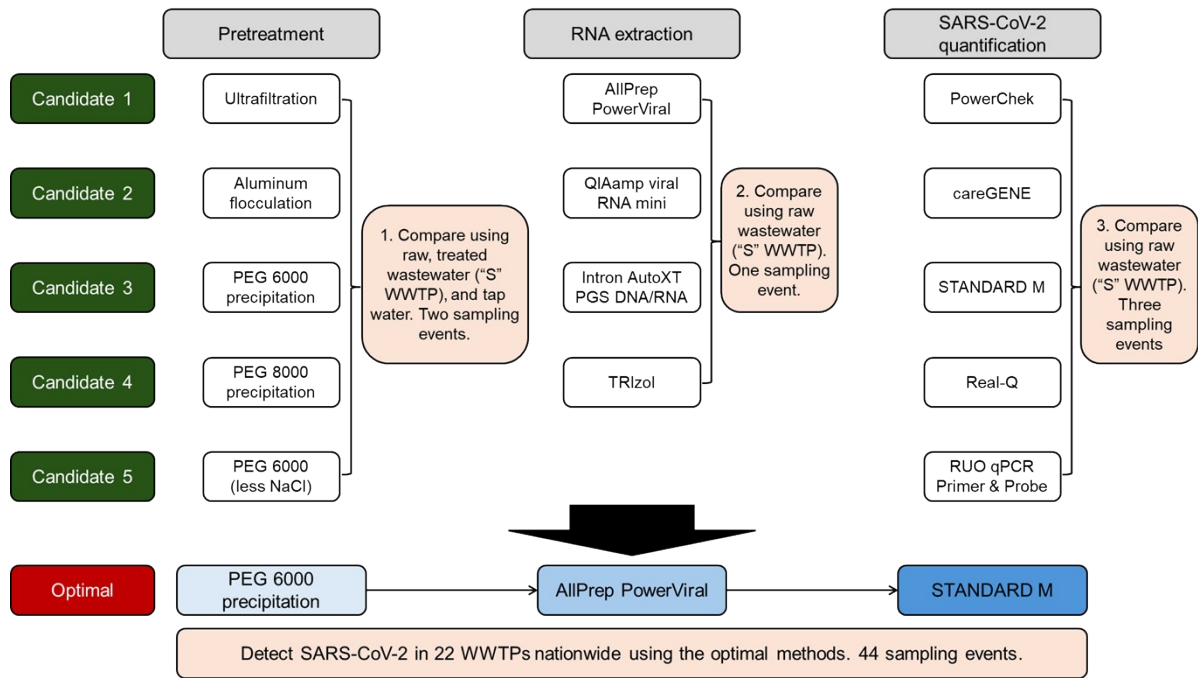

**SI Fig. S1.** Summary of candidate virus-detection methods (pretreatment, RNA extraction, and SARS-CoV-2 quantification methods; see Section 2.2 for details) and an optimal method based on a comparative study.

|                         | Vero                                                                                | A549                                                                                 |
|-------------------------|-------------------------------------------------------------------------------------|--------------------------------------------------------------------------------------|
| Raw wastewater          | 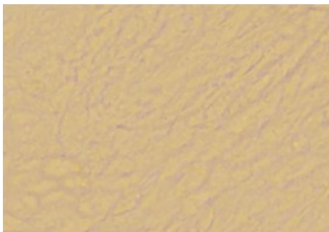   |    |
| Frozen wastewater       |    |    |
| Concentrated wastewater |   |   |
| Negative control        |  |  |

**SI Fig. S2** Infectivity results of wastewater-bound SARS-CoV-2 in four different samples tested on two different cell types. No cytopathic effects were observed in any of the samples.

## References

Barra, G. B., Santa Rita, T. H., Mesquita, P. G., Jácomo, R. H., & Nery, L. F. A. (2020). Analytical Sensitivity and Specificity of Two RT-qPCR Protocols for SARS-CoV-2 Detection Performed in an Automated Workflow. *Genes*, 11, 1183. <https://doi.org/10.3390/genes11101183>

Kaya, D., Niemeier, D., Ahmed, W., & Kjellerup, B. V. (2022). Evaluation of multiple analytical methods for SARS-CoV-2 surveillance in wastewater samples. *Science of The Total Environment*, 808, 152033. [https://doi.org/https://doi.org/10.1016/j.scitotenv.2021.152033](https://doi.org/10.1016/j.scitotenv.2021.152033)
